# Supplementary material
Source: Springer Nature journal article supplement (https://www.springermedizin.de/resource/supplementary/12885_2010_2715_MOESM4_ESM.pdf/9461866)

**ANLN in FNAB-array**

$P < 0.0001$

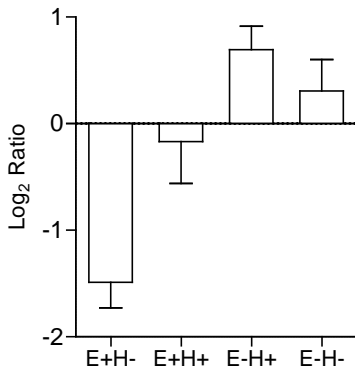

**KIF2C in FNAB-array**

$P < 0.0001$

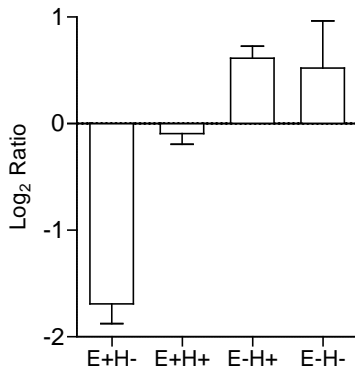

**MAPT in FNAB-array**

$P < 0.0001$

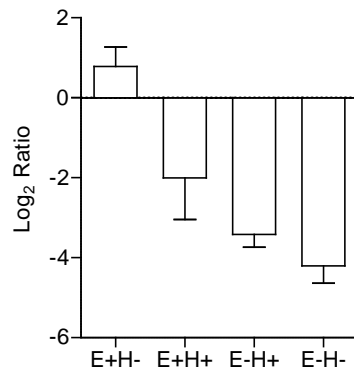

**ANLN in FFPE-array**

$P = 0.0024$

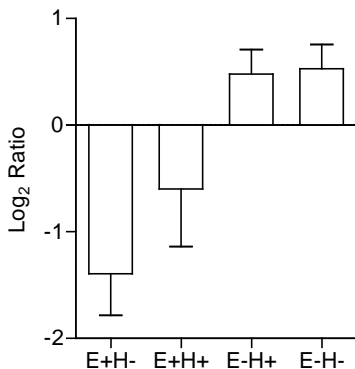

**KIF2C in FFPE-array**

$P = 0.0012$

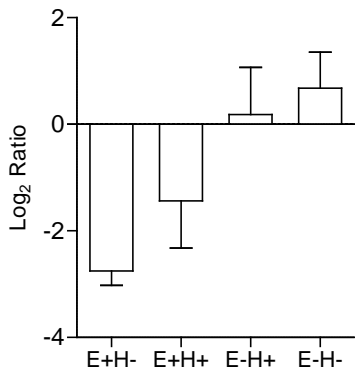

**MAPT in FFPE-array**

$P < 0.0001$

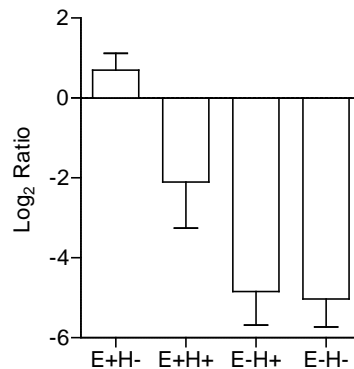

**ANLN FFPE-qPCR**

$P = 0.0070$

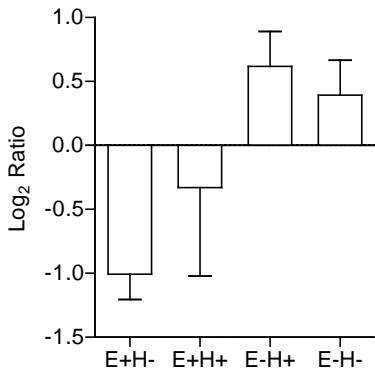

**KIF2C in FFPE-qPCR**

$P = 0.0202$

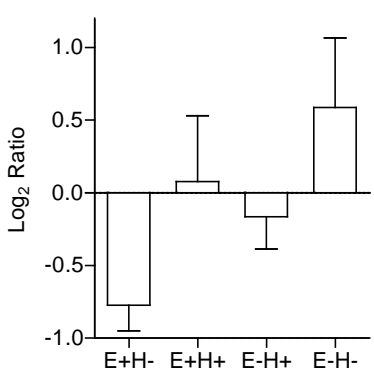

**MAPT in FFPE-qPCR**

$P < 0.0001$

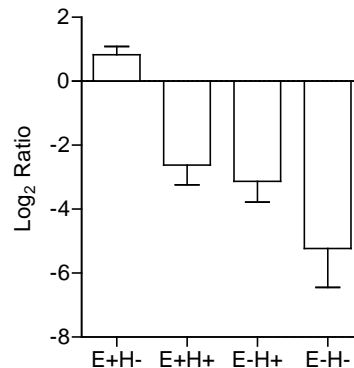

Supplement: MOESM4 [file 9461866]
